# Supplementary material for: Differences in Behavior and Activity Associated with a Poly(A) Expansion in the Dopamine Transporter in Belgian Malinois
Source: PubMed Central journal article supplement (PMC3871558; doi:10.1371/journal.pone.0082948), 2013-12-23

Supplemental Figure 1. Partial pedigree information for dogs in our dataset. Key: Orange square or circle: dog is included in our dataset; Square: Male; Oval: Female; Dashed line: terminal parental node; Dashed diamond: gender not specified.

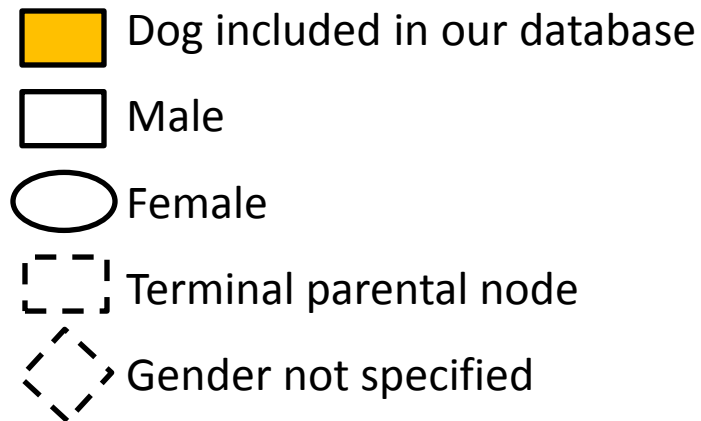

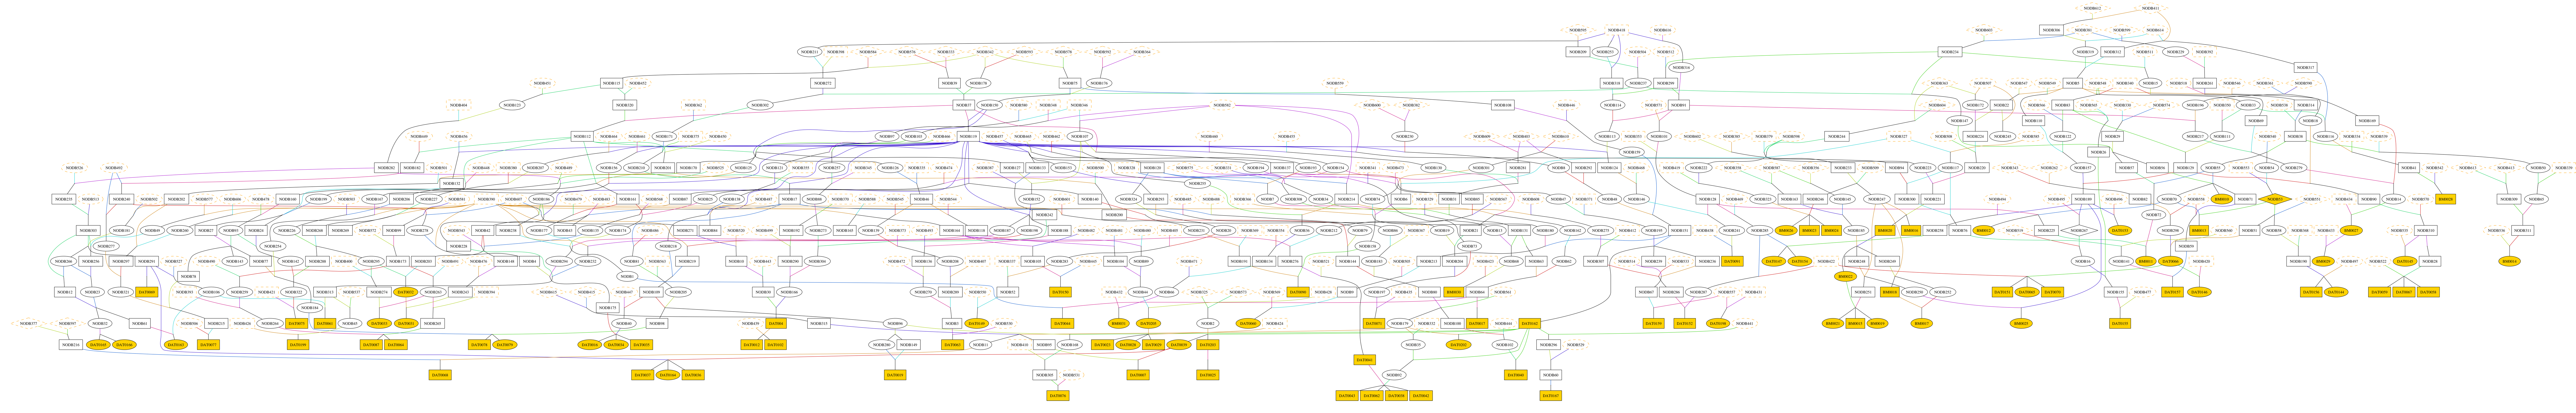

Supplement: pone.0082948.s001.pdf [file pone.0082948.s001.pdf]
