# Supplementary material for: Differences in Behavior and Activity Associated with a Poly(A) Expansion in the Dopamine Transporter in Belgian Malinois
Source: PubMed Central journal article supplement (PMC3871558; doi:10.1371/journal.pone.0082948), 2013-12-23

Supplemental Figure 2. Partial pedigree information for dogs in our dataset. Key: Orange square or circle: dog is included in our dataset, dog has at least one PolyA allele, and owner reported at least one behavioral change; Square: Male; Oval: Female; Dashed line: terminal parental node; Dashed diamond: gender not specified.

-  Dog included in our database, has at least one PolyA allele, and owner reported at least one behavioral change
-  Male
-  Female
-  Terminal parental node
-  Gender not specified

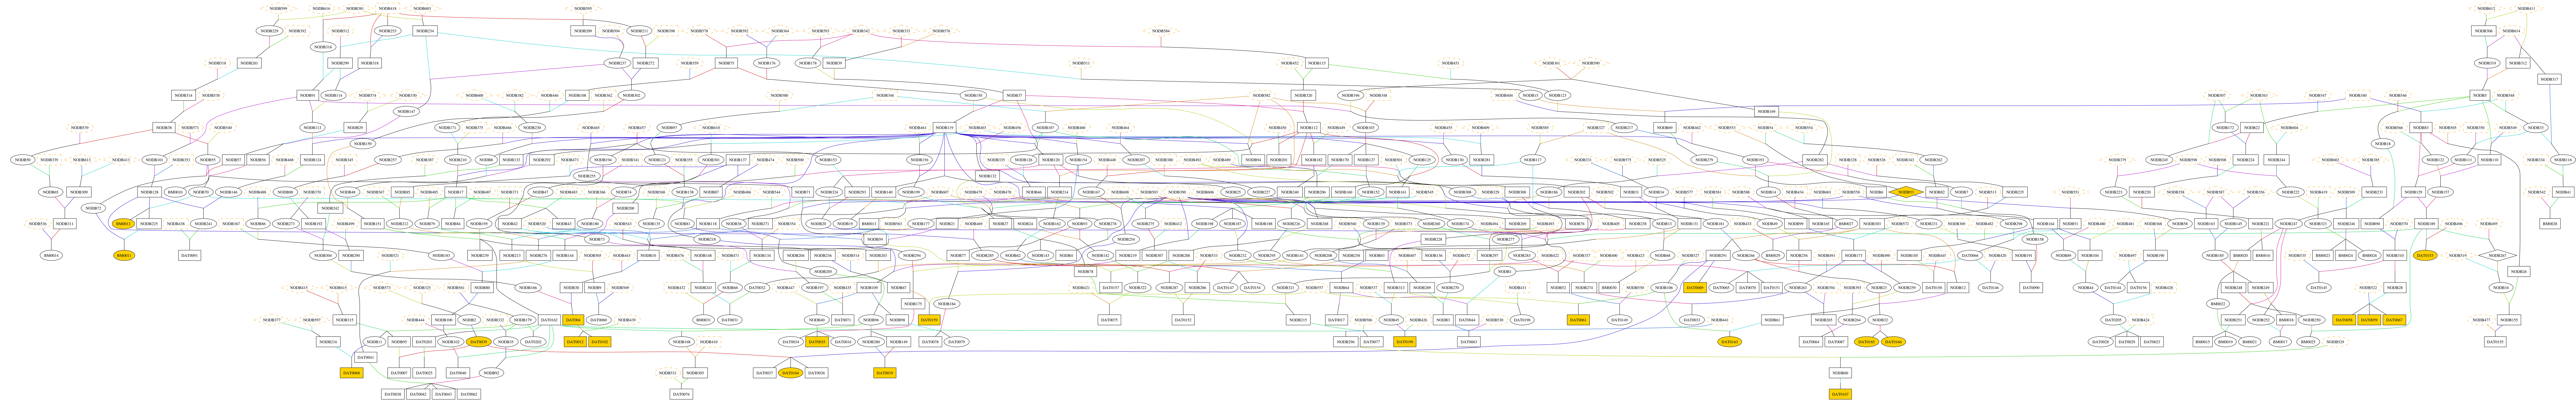

Supplement: pone.0082948.s002.pdf [file pone.0082948.s002.pdf]
