# Supplementary material for: Differences in Behavior and Activity Associated with a Poly(A) Expansion in the Dopamine Transporter in Belgian Malinois
Source: PubMed Central journal article supplement (PMC3871558; doi:10.1371/journal.pone.0082948), 2013-12-23
Supplement: pone.0082948.s003.pdf [file pone.0082948.s003.pdf]

Supplemental Figure 3. Snapshot from Ensembl genome browser (CanFam 2.0) indicating part of poly(A) retrotransposon (red box) as putative exon in Boxer reference sequence.

([http://dec2011.archive.ensembl.org/Canis\\_familiaris/Location/Comparison\\_Alignments?chr=34;end=14249652;r=34:14249403-14249652;start=14249403](http://dec2011.archive.ensembl.org/Canis_familiaris/Location/Comparison_Alignments?chr=34;end=14249652;r=34:14249403-14249652;start=14249403)).

Location:   Gene:

### Key

Features

Archive ensemblexons

**Canis lupus familiaris** > [chromosome:BROADD2:34:14249403:14249652:1](#)

```
Canis lupus familiaris CAGATCAGACATTACTCTAACTATTGCTATTTTGTATAGAAACACTGTCCTGGGTTAATG
Canis lupus familiaris TGCATGTTGAGTATTTTCCCACCCTACTTTCTGGCATATGCATCTTTTGTGGAGGATCA
Canis lupus familiaris TTTTCTTGCTTAAAAAAGGAAAATCAAAAAAAAAAAGGAAAATCCTCAGCCTGTCTTTTA
Canis lupus familiaris AGGAGGCCCTTGACAAACTTCCCCTCTTGTGTGTCCGTATATGTCTTCCTTTTCCC
Canis lupus familiaris TGCTTGATGA
```
