# Supplementary material for: Differences in Behavior and Activity Associated with a Poly(A) Expansion in the Dopamine Transporter in Belgian Malinois
Source: PLoS One. 2013 Dec 23;8(12):e82948. doi: 10.1371/journal.pone.0082948 (PMC3871558; doi:10.1371/journal.pone.0082948)
Supplement: Table S3 — Frequency distributions for owners responding “yes” to questions regarding dog glazing over, episodic aggression, and/or seizure. (XLS) [file pone.0082948.s006.xls]

## Sheet: Table S3 Question distributions
Table S3. Frequency distributions for owners responding "yes" to questions regarding dog glazing over, episodic aggression, and/or seizure.
PolyA(22) alleles	At least one of 3 questions	Glazed + Aggressive	Aggressive only	Glaze Only	Seizure
0	11	1	6	6	0
1 or 2	43	14	32	21	5
Total	54	15	38	27	5
